# Supplementary material
Source: Springer Nature journal article supplement (https://www.springermedizin.de/resource/supplementary/13014_2013_1013_MOESM1_ESM.pdf/9634880)
Supplement: MOESM1 [file 9634880]

1. Patient immobilisation
- ↓
2. MRI scan (about 10 min)
- ↓
3. Shuttle transport from MRI device to linac (about 5 min)
- ↓
4. Positioning on the linac table
- ↓
5. CT image-guidance
- ↓
6. Position correction
- ↓
7. Radiation fraction
